# Supplementary material for: Pyrolysis of sargassum in a single mode microwave cavity: use of SiC and biochar as microwave absorbers
Source: Royal Society of Chemistry journal article supplement (doi:10.1039/d3re00523b), 2024-01-01
Supplement: d3re00523b1.pdf [file d3re00523b1.pdf]

## Supporting information

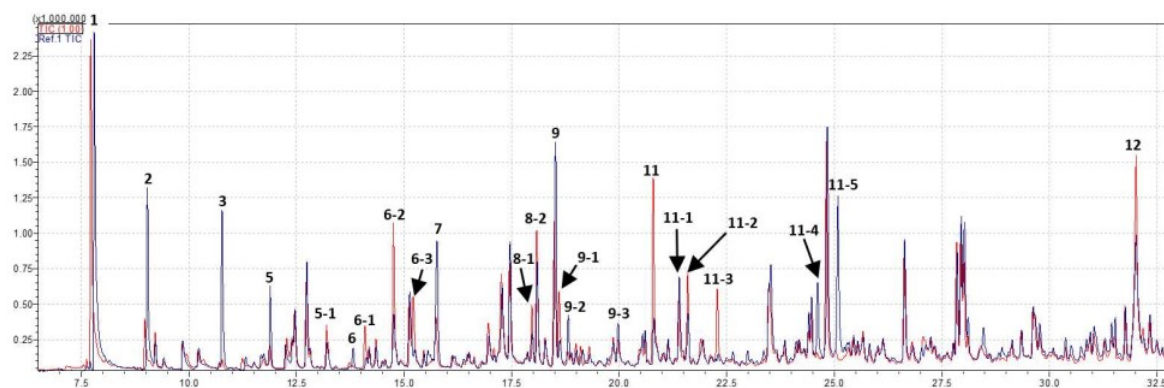

Figure S1. Sargassum oil chromatogram: SG Char (blue) superposed on Sargassum oil SIC (red) - (Zoom 6-33 minutes).

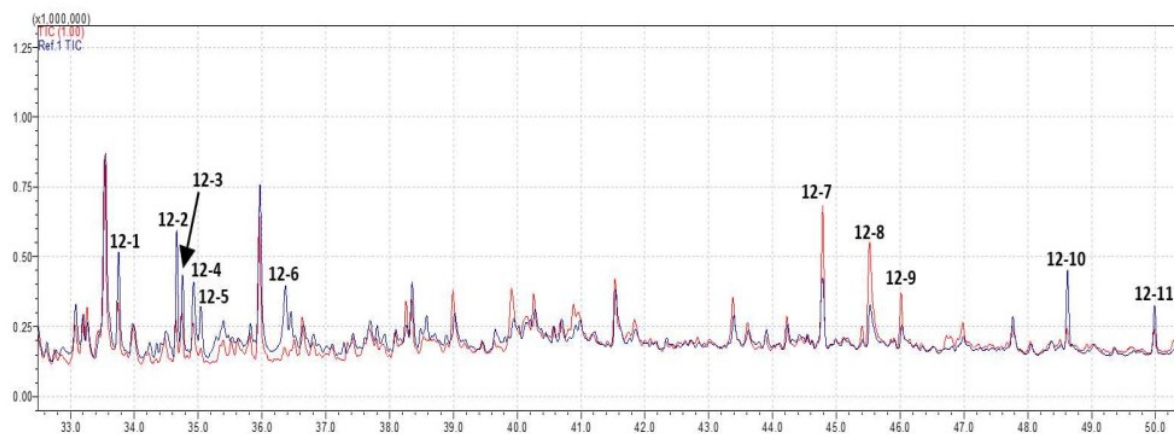

Figure S2. Sargassum oil chromatogram: SG Char (blue) superposed on Sargassum oil SIC (red) - (Zoom 33 - 50 minutes).

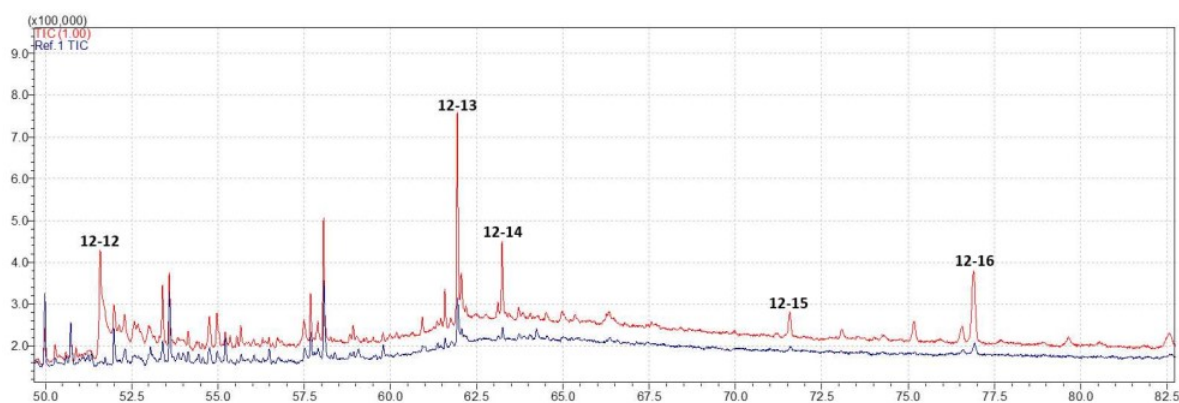

Figure S3. Sargassum oil chromatogram: SG Char (blue) superposed on Sargassum oil SIC (red) - (Zoom 50 – 82.5 minutes).
